# Supplementary material
Source: Springer Nature journal article supplement (https://www.springermedizin.de/resource/supplementary/13014_2006_46_MOESM4_ESM.pdf/9632796)

# HI vs volume

$$\text{HI} = 1.2375 + 0.0005 * \text{volume}$$

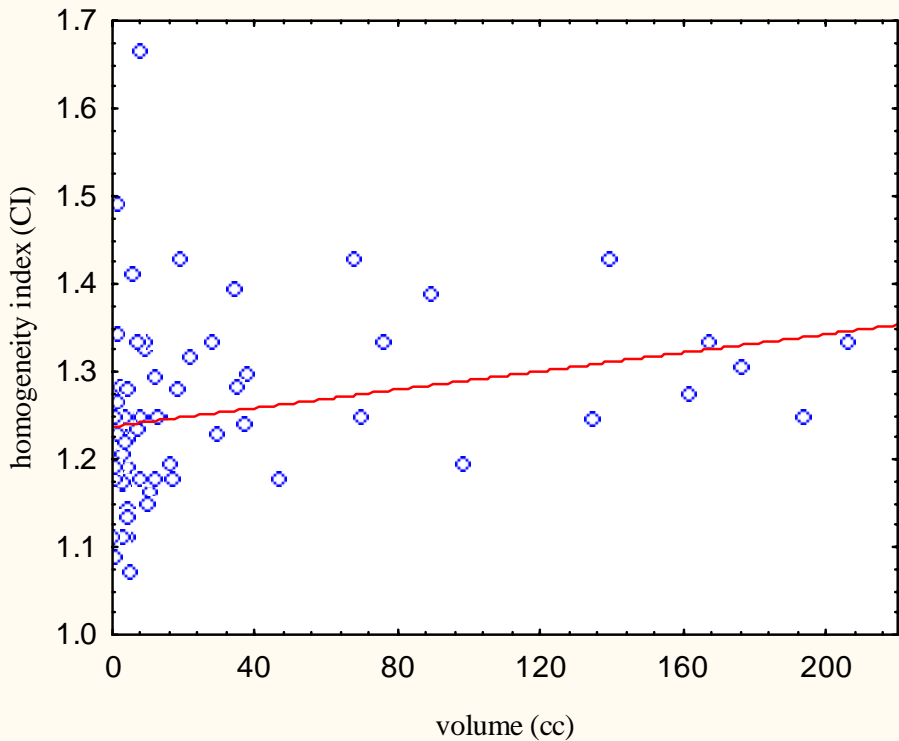

Supplement: MOESM4 [file 9632796]
